# Supplementary material for: Introgression among North American wild grapes (Vitis) fuels biotic and abiotic adaptation
Source: PubMed Central journal article supplement (PMC8414701; doi:10.1186/s13059-021-02467-z), 2021-09-03
Supplement: 13059_2021_2467_MOESM1_ESM.pdf [file 13059_2021_2467_MOESM1_ESM.pdf]

## **Additional File 1: Supplementary Tables S1-S12 for**

Extensive introgression among North American wild grapes (*Vitis*) fuels biotic and abiotic adaptation

Abraham Morales-Cruz<sup>1</sup>, Jonas Aguirre-Ligouri<sup>1</sup>, Yongfeng Zhou<sup>1</sup>, Andrea Minio<sup>2</sup>, Summaira Riaz<sup>2</sup>, Andrew M. Walker<sup>2</sup>, Dario Cantu<sup>2</sup>, and Brandon S. Gaut<sup>\*2</sup>

<sup>1</sup> Dept. Ecology and Evolutionary Biology, University of California Irvine, Irvine, CA

<sup>2</sup> Dept. of Viticulture, University of California, Davis, Davis, CA

\*Address for Correspondence: Brandon Gaut, Department of Ecology and Evolutionary Biology, 321 Steinhaus Hall, UC Irvine, 92697; Email: [bgaut@uci.edu](mailto:bgaut@uci.edu); Phone: (949) 677-06972

**Table S1.** Statistics of the *V. arizonica* b40-14 genome assembly

| <b>Metric</b>                        | <b>Number</b> |
|--------------------------------------|---------------|
| Total number of bases                | 503291318     |
| Number of sequences                  | 19            |
| Average length of sequences          | 2.65E+07      |
| Minimum length of sequences          | 17755125      |
| Maximum length of sequences          | 47005314      |
| N10 length                           | 35285526      |
| N20 length                           | 33926803      |
| N30 length                           | 30932466      |
| N40 length                           | 30043575      |
| N50 length                           | 25930761      |
| N60 length                           | 25085101      |
| N70 length                           | 23233325      |
| N80 length                           | 22502345      |
| N90 length                           | 19267294      |
| N10 index                            | 2             |
| N20 index                            | 3             |
| N30 index                            | 5             |
| N40 index                            | 6             |
| N50 index                            | 8             |
| N60 index                            | 10            |
| N70 index                            | 12            |
| N80 index                            | 14            |
| N90 index                            | 17            |
| Number of sequences $\geq$ 100bp     | 19            |
| Avg length of sequences $\geq$ 100bp | 2.65E+07      |
| N50 sequences $\geq$ 100bp           | 25930761      |

**Table S2.** Summary table of the BUSCO genes of both haplotypes detected in the *V. arizonica* genome assembly

| <b>Metric</b>                       | <b>Count</b> | <b>Percentage</b> |
|-------------------------------------|--------------|-------------------|
| Complete BUSCOs (C)                 | 1389         | 96.40%            |
| Complete and single-copy BUSCOs (S) | 493          | 34.20%            |
| Complete and duplicated BUSCOs (D)  | 896          | 62.20%            |
| Fragmented BUSCOs (F)               | 14           | 1.00%             |
| Missing BUSCOs (M)                  | 37           | 2.60%             |
| Total BUSCO groups searched         | 1440         |                   |

**Table S3.** Accession identifiers and geographical coordinates of the 130 accessions used in this study. Coordinates correspond to the original collection site of the accession.

| Accession | Sample ID | Species after phylogeny | Latitude | Longitude  |
|-----------|-----------|-------------------------|----------|------------|
| NM11-048  | vari12    | <i>V. arizonica</i>     | 33.03475 | -108.20006 |
| NM11-031  | vari11    | <i>V. arizonica</i>     | 32.91086 | -108.22894 |
| NM11-047  | vari21    | <i>V. arizonica</i>     | 33.03644 | -108.20619 |
| NM11-040  | vari16    | <i>V. arizonica</i>     | 33.03514 | -108.22894 |
| NM11-034  | vari14    | <i>V. arizonica</i>     | 32.91928 | -108.21964 |
| NM11-033  | vari13    | <i>V. arizonica</i>     | 32.91944 | -108.21933 |
| NM11-046  | vari07    | <i>V. arizonica</i>     | 33.03928 | -108.22067 |
| NM11-035  | vari03    | <i>V. arizonica</i>     | 32.92264 | -108.21567 |
| NM11-026  | vari09    | <i>V. arizonica</i>     | 32.89156 | -108.23436 |
| TXNM088   | vber09    | <i>V. arizonica</i>     | 29.28985 | -103.92507 |
| NM11-044f | vari20    | <i>V. arizonica</i>     | 33.03994 | -108.22264 |
| NM11-044a | vari19    | <i>V. arizonica</i>     | 33.03994 | -108.22264 |
| NM11-042  | vari17    | <i>V. arizonica</i>     | 33.03503 | -108.22875 |
| NM11-038  | vari15    | <i>V. arizonica</i>     | 32.94819 | -108.20100 |
| NM11-027  | vari10    | <i>V. arizonica</i>     | 32.90675 | -108.23219 |
| NM11-039  | vari06    | <i>V. arizonica</i>     | 32.94953 | -108.20667 |
| ANU58     | vrip15    | <i>V. arizonica</i>     | 34.51501 | -111.76801 |
| NM11-043  | vari18    | <i>V. arizonica</i>     | 33.03994 | -108.22264 |
| NM11-037  | vari05    | <i>V. arizonica</i>     | 32.93492 | -108.20075 |
| NM11-036  | vari04    | <i>V. arizonica</i>     | 32.92881 | -108.21033 |
| NM11-045  | vari02    | <i>V. arizonica</i>     | 33.03961 | -108.22000 |
| NM11-049  | vari01    | <i>V. arizonica</i>     | 33.03500 | -108.20050 |
| TX16-022  | vber21    | <i>V. berlandieri</i>   | 30.84407 | -98.09657  |
| TX16-032  | vber14    | <i>V. berlandieri</i>   | 30.43791 | -98.34980  |
| TX16-064  | vcan26    | <i>V. berlandieri</i>   | 30.24638 | -98.04376  |
| TX16-018  | vber18    | <i>V. berlandieri</i>   | 31.03509 | -98.14784  |
| TX16-065  | vber28    | <i>V. berlandieri</i>   | 30.14990 | -98.05138  |
| TX16-026  | vber12    | <i>V. berlandieri</i>   | 30.79163 | -98.16845  |
| TX15-003  | vber10    | <i>V. berlandieri</i>   | 29.84893 | -100.02290 |
| TX16-034  | vber26    | <i>V. berlandieri</i>   | 30.03024 | -98.83222  |
| TX16-035  | vber27    | <i>V. berlandieri</i>   | 30.02967 | -98.83170  |
| TX16-016  | vber17    | <i>V. berlandieri</i>   | 31.33896 | -97.51378  |
| TX15-059  | vber11    | <i>V. berlandieri</i>   | 30.43829 | -98.34963  |
| T21       | vber02    | <i>V. berlandieri</i>   | 30.48940 | -99.77200  |

|                |        |                       |          |            |
|----------------|--------|-----------------------|----------|------------|
| T18            | vber29 | <i>V. berlandieri</i> | 30.48940 | -99.77200  |
| TX15-063       | vber23 | <i>V. berlandieri</i> | 30.68166 | -98.31197  |
| C 8-93         | vber20 | <i>V. berlandieri</i> | 31.67678 | -98.04191  |
| C 5-93         | vber19 | <i>V. berlandieri</i> | 31.16966 | -97.42910  |
| TX16-030       | vber13 | <i>V. berlandieri</i> | 30.68943 | -98.27036  |
| T 03-05 S03    | vber07 | <i>V. berlandieri</i> | 30.24687 | -98.87010  |
| TX9722         | vber05 | <i>V. berlandieri</i> | 28.70910 | -100.04950 |
| T38            | vber04 | <i>V. berlandieri</i> | 30.40020 | -97.67910  |
| T23            | vber03 | <i>V. berlandieri</i> | 30.04740 | -99.14030  |
| TX43-01        | vber01 | <i>V. berlandieri</i> | 30.31996 | -97.99865  |
| T45            | vcan02 | <i>V. candicans</i>   | 30.75930 | -98.67500  |
| T64            | vcan17 | <i>V. candicans</i>   | 31.13000 | -97.78000  |
| TX9715         | vcan15 | <i>V. candicans</i>   | 29.34750 | -99.14140  |
| candicans 9003 | vcan29 | <i>V. candicans</i>   | 32.49250 | -95.80917  |
| candicans 9005 | vcan30 | <i>V. candicans</i>   | 32.49250 | -95.80917  |
| T62            | vcan16 | <i>V. candicans</i>   | 31.27230 | -97.51570  |
| T36            | vcan13 | <i>V. candicans</i>   | 30.40020 | -97.67570  |
| TX12-003       | vcan09 | <i>V. candicans</i>   | 33.39661 | -97.50039  |
| TX32-01        | vcan04 | <i>V. candicans</i>   | 30.04743 | -99.14032  |
| T48            | vcan03 | <i>V. candicans</i>   | 30.75620 | -98.70030  |
| T46            | vcan14 | <i>V. candicans</i>   | 30.75930 | -98.67500  |
| T2             | vcan10 | <i>V. candicans</i>   | 33.25760 | -97.58324  |
| T56            | vcan08 | <i>V. candicans</i>   | 31.09820 | -97.34280  |
| candicans 9039 | vcan31 | <i>V. candicans</i>   | 29.91972 | -97.19306  |
| candicans 9001 | vcan28 | <i>V. candicans</i>   | 31.76583 | -95.61667  |
| TX16-024       | vcan27 | <i>V. candicans</i>   | 30.81022 | -98.10594  |
| TX16-006       | vcan25 | <i>V. candicans</i>   | 31.10614 | -97.91810  |
| TX16-001       | vcan24 | <i>V. candicans</i>   | 30.93038 | -97.52800  |
| TX14-081       | vcan23 | <i>V. candicans</i>   | 30.00979 | -97.94384  |
| T 03-13        | vcan21 | <i>V. candicans</i>   | 30.83118 | -99.39540  |
| T 03-08        | vcan20 | <i>V. candicans</i>   | 30.16750 | -98.77183  |
| T 03-05        | vcan19 | <i>V. candicans</i>   | 30.24687 | -98.87010  |
| TX9703         | vcan12 | <i>V. candicans</i>   | 29.96270 | -98.78630  |
| T73            | vcan11 | <i>V. candicans</i>   | 31.38660 | -97.15040  |
| SC37           | vgir19 | <i>V. girdiana</i>    | 33.33007 | -117.23638 |
| NV12-040       | vgir01 | <i>V. girdiana</i>    | 36.16128 | -115.49850 |
| SC11           | vgir25 | <i>V. girdiana</i>    | 36.41840 | -116.31895 |
| SC9            | vgir06 | <i>V. girdiana</i>    | 36.41840 | -116.31895 |
| SC26           | vgir23 | <i>V. girdiana</i>    | 34.93163 | -118.92795 |
| SC39           | vgir26 | <i>V. girdiana</i>    | 33.31813 | -117.19465 |

|                |        |                     |          |            |
|----------------|--------|---------------------|----------|------------|
| NV12-041       | vgir14 | <i>V. girdiana</i>  | 36.15642 | -115.49542 |
| NV11-118       | vgir12 | <i>V. girdiana</i>  | 36.37539 | -114.44308 |
| NV11-115       | vgir10 | <i>V. girdiana</i>  | 36.38999 | -114.42996 |
| ANU78          | vgir02 | <i>V. girdiana</i>  | 36.38925 | -114.42955 |
| NV12-050       | vgir15 | <i>V. girdiana</i>  | 36.41986 | -116.32050 |
| NV11-116       | vgir11 | <i>V. girdiana</i>  | 36.37678 | -114.44361 |
| SC53           | vgir17 | <i>V. girdiana</i>  | 33.10527 | -117.04198 |
| SC36           | vgir27 | <i>V. girdiana</i>  | 33.33007 | -117.23638 |
| SC30           | vgir22 | <i>V. girdiana</i>  | 33.46235 | -117.13700 |
| SC33           | vgir21 | <i>V. girdiana</i>  | 33.39145 | -117.21640 |
| SC40           | vgir20 | <i>V. girdiana</i>  | 33.36293 | -117.10158 |
| SC51           | vgir16 | <i>V. girdiana</i>  | 33.06660 | -116.87915 |
| C20-93-A       | vmon05 | <i>V. monticola</i> | 31.06623 | -97.57890  |
| T 03-02 S01    | vmon04 | <i>V. monticola</i> | 29.98305 | -98.90348  |
| monticola 9040 | vmon07 | <i>V. monticola</i> | 32.49250 | -95.80917  |
| C20-93         | vmon06 | <i>V. monticola</i> | 31.06623 | -97.57890  |
| T40            | vmon02 | <i>V. monticola</i> | 30.30610 | -97.95240  |
| TX67-03        | vmon01 | <i>V. monticola</i> | 31.43516 | -97.74391  |
| NM12-119       | vrip21 | <i>V. riparia</i>   | 36.21283 | -105.92722 |
| NM12-114       | vrip07 | <i>V. riparia</i>   | 35.98822 | -105.93197 |
| NM12-108       | vrip19 | <i>V. riparia</i>   | 35.32289 | -105.41953 |
| NM12-117       | vrip09 | <i>V. riparia</i>   | 36.15992 | -105.97272 |
| NM12-116       | vrip08 | <i>V. riparia</i>   | 35.98911 | -105.93036 |
| KS14-036       | vrip12 | <i>V. riparia</i>   | 37.24091 | -99.98147  |
| CO12-103       | vrip02 | <i>V. riparia</i>   | 37.11083 | -104.28486 |
| KS14-043       | vrip23 | <i>V. riparia</i>   | 37.29012 | -98.61109  |
| NM12-104       | vrip18 | <i>V. riparia</i>   | 35.66897 | -105.34619 |
| TXNM0824       | vrip17 | <i>V. riparia</i>   | 35.66893 | -105.33610 |
| TXNM0823       | vrip16 | <i>V. riparia</i>   | 35.66893 | -105.33610 |
| CO12-102       | vrip14 | <i>V. riparia</i>   | 37.21572 | -104.46469 |
| OK14-064       | vrip13 | <i>V. riparia</i>   | 36.53865 | -98.87695  |
| KS14-035       | vrip11 | <i>V. riparia</i>   | 37.24038 | -99.98163  |
| OK14-027       | vrip10 | <i>V. riparia</i>   | 36.83688 | -100.51925 |
| NM12-111       | vrip06 | <i>V. riparia</i>   | 35.26753 | -105.33447 |
| V28-96         | vrip05 | <i>V. riparia</i>   | 41.14871 | -73.27039  |
| V23-98         | vrip04 | <i>V. riparia</i>   | 41.71946 | -72.57670  |
| OK14-026       | vrip01 | <i>V. riparia</i>   | 36.83703 | -100.51897 |
| T39            | vcan06 | hybrid              | 30.30610 | -97.95240  |
| UT12-094       | vgir05 | hybrid              | 37.29369 | -113.41414 |
| OK12-025       | vcan22 | hybrid              | 34.10983 | -98.53114  |

|                             |        |        |          |            |
|-----------------------------|--------|--------|----------|------------|
| OK12-027                    | vcan07 | hybrid | 34.11075 | -98.53250  |
| OK12-019                    | vcan05 | hybrid | 34.12075 | -98.52269  |
| T42                         | vcan01 | hybrid | 30.32000 | -97.99860  |
| TXNM083                     | vber08 | hybrid | 30.53358 | -103.78433 |
| SC12                        | vgir09 | hybrid | 37.03228 | -117.32460 |
| NV11-119 (GVC)              | vgir13 | hybrid | 35.22736 | -114.68964 |
| PC96-C                      | vrip22 | hybrid | NA       | NA         |
| TX9714                      | vmon03 | hybrid | 29.34750 | -99.14140  |
| SC23                        | vgir24 | hybrid | 35.66705 | -118.25247 |
| SC27                        | vgir08 | hybrid | 34.93163 | -118.92795 |
| SC42                        | vgir07 | hybrid | 33.28781 | -116.87448 |
| UT12-084                    | vgir04 | hybrid | 37.30861 | -113.42914 |
| UT12-075                    | vgir03 | hybrid | 37.31033 | -113.43553 |
| candicans x aestivalis 9012 | vcan32 | hybrid | 31.76583 | -95.61667  |
| T74                         | vcan18 | hybrid | 31.38660 | -97.15040  |
| T 03-01 S01                 | vber06 | hybrid | 29.98305 | -98.90348  |

---

**Table S4.** Chromosome size, raw number of predicted SNPs and number of SNPs after filtering across all 130 samples

| <b>Chromosome</b>         | <b>Size (bp)</b>   | <b>Size (Mbp)</b> | <b>SNPs raw biallelic</b> | <b>SNPs after filtering</b> |
|---------------------------|--------------------|-------------------|---------------------------|-----------------------------|
| Vari_b40-14_v1.hap1.chr01 | 33,926,803         | 33.9              | 2,782,419                 | 1,375,689                   |
| Vari_b40-14_v1.hap1.chr02 | 22,787,875         | 22.8              | 1,955,943                 | 920,414                     |
| Vari_b40-14_v1.hap1.chr03 | 17,755,125         | 17.8              | 1,542,440                 | 767,980                     |
| Vari_b40-14_v1.hap1.chr04 | 30,932,466         | 30.9              | 2,566,482                 | 1,169,772                   |
| Vari_b40-14_v1.hap1.chr05 | 25,930,761         | 25.9              | 2,311,363                 | 1,188,958                   |
| Vari_b40-14_v1.hap1.chr06 | 23,233,325         | 23.2              | 1,759,313                 | 968,551                     |
| Vari_b40-14_v1.hap1.chr07 | 35,285,526         | 35.3              | 2,852,943                 | 1,378,311                   |
| Vari_b40-14_v1.hap1.chr08 | 19,150,580         | 19.2              | 1,496,299                 | 612,688                     |
| Vari_b40-14_v1.hap1.chr09 | 25,085,101         | 25.1              | 2,036,641                 | 931,494                     |
| Vari_b40-14_v1.hap1.chr10 | 23,682,995         | 23.7              | 2,032,387                 | 1,089,722                   |
| Vari_b40-14_v1.hap1.chr11 | 19,267,294         | 19.3              | 1,355,229                 | 665,031                     |
| Vari_b40-14_v1.hap1.chr12 | 32,374,331         | 32.4              | 2,849,773                 | 1,316,433                   |
| Vari_b40-14_v1.hap1.chr13 | 30,043,575         | 30.0              | 2,576,413                 | 1,324,160                   |
| Vari_b40-14_v1.hap1.chr14 | 27,053,463         | 27.1              | 2,430,724                 | 1,229,304                   |
| Vari_b40-14_v1.hap1.chr15 | 22,502,345         | 22.5              | 1,999,980                 | 836,821                     |
| Vari_b40-14_v1.hap1.chr16 | 25,629,229         | 25.6              | 2,132,614                 | 916,236                     |
| Vari_b40-14_v1.hap1.chr17 | 19,376,636         | 19.4              | 1,776,932                 | 918,695                     |
| Vari_b40-14_v1.hap1.chr18 | 47,005,314         | 47.0              | 3,832,273                 | 1,639,733                   |
| Vari_b40-14_v1.hap1.chr19 | 22,268,574         | 22.3              | 1,807,138                 | 741,236                     |
| <b>Total</b>              | <b>503,291,318</b> | <b>503</b>        | <b>42,097,306</b>         | <b>19,991,228</b>           |



**Table S5.** Genome-wide calculation of nucleotide diversity ( $\pi$ ) within per species

| <b>Species</b>        | $\pi$   |
|-----------------------|---------|
| <i>V. monticola</i>   | 0.00353 |
| <i>V. riparia</i>     | 0.00312 |
| <i>V. candicans</i>   | 0.00304 |
| <i>V. arizonica</i>   | 0.00270 |
| <i>V. girdiana</i>    | 0.00255 |
| <i>V. berlandieri</i> | 0.00211 |

**Table S6.** Results from genome-wide estimates of introgressions across all combination of trios tested.

| <b>Trio</b> | <b>P1</b>        | <b>P2</b>          | <b>P3</b>          | <b>D</b> | <b>Z-score</b> | <b>p-value</b> | <b>f4-ratio</b> | <b>BBA</b> | <b>ABBA</b> | <b>BABA</b> |
|-------------|------------------|--------------------|--------------------|----------|----------------|----------------|-----------------|------------|-------------|-------------|
| GAM         | <i>girdiana</i>  | <i>arizonica</i>   | <i>monticola</i>   | 0.086    | 15.764         | 0.00E+00       | 8.03%           | 312836     | 147982      | 124492      |
| GRM         | <i>girdiana</i>  | <i>riparia</i>     | <i>monticola</i>   | 0.062    | 10.308         | 0.00E+00       | 6.08%           | 294631     | 151684      | 133908      |
| ARC         | <i>arizonica</i> | <i>riparia</i>     | <i>candicans</i>   | 0.091    | 21.944         | 0.00E+00       | 2.43%           | 411536     | 126061      | 105037      |
| MBC         | <i>monticola</i> | <i>berlandieri</i> | <i>candicans</i>   | 0.071    | 9.224          | 0.00E+00       | 3.24%           | 231272     | 189653      | 164656      |
| GRC         | <i>girdiana</i>  | <i>riparia</i>     | <i>candicans</i>   | 0.087    | 17.202         | 0.00E+00       | 2.30%           | 417236     | 124661      | 104798      |
| ARB         | <i>arizonica</i> | <i>riparia</i>     | <i>berlandieri</i> | 0.116    | 27.752         | 0.00E+00       | 7.40%           | 350794     | 140344      | 111062      |
| GRB         | <i>girdiana</i>  | <i>riparia</i>     | <i>berlandieri</i> | 0.119    | 23.024         | 0.00E+00       | 7.47%           | 357161     | 139597      | 110007      |
| AGR         | <i>arizonica</i> | <i>girdiana</i>    | <i>riparia</i>     | 0.021    | 2.961          | 1.54E-03       | 3.32%           | 204334     | 176756      | 169492      |
| RAM         | <i>riparia</i>   | <i>arizonica</i>   | <i>monticola</i>   | 0.019    | 2.737          | 3.10E-03       | 2.07%           | 281783     | 151658      | 145974      |
| AGC         | <i>arizonica</i> | <i>girdiana</i>    | <i>candicans</i>   | 0.005    | 1.256          | 1.05E-01       | 0.13%           | 446358     | 106248      | 105140      |
| GAB         | <i>girdiana</i>  | <i>arizonica</i>   | <i>berlandieri</i> | 0.001    | 0.358          | 3.60E-01       | 0.09%           | 388298     | 113818      | 113480      |

**Table S7.** GO terms significantly enriched ( $p < 0.05$ ) in pIRs

| <b>Trio</b> | <b>GO ID</b> | <b>GO Description</b>                              | <b>p-value</b> |
|-------------|--------------|----------------------------------------------------|----------------|
| AGR         | GO:0005575   | C:cellular_component                               | 8.87E-04       |
| ARB         | GO:0005575   | C:cellular_component                               | 5.46E-03       |
| ARB         | GO:0030246   | F:carbohydrate binding                             | 1.81E-09       |
| GRB         | GO:0030246   | F:carbohydrate binding                             | 9.54E-06       |
| GRC         | GO:0030246   | F:carbohydrate binding                             | 5.34E-05       |
| GRM         | GO:0030246   | F:carbohydrate binding                             | 5.12E-25       |
| ARB         | GO:0016301   | F:kinase activity                                  | 7.01E-07       |
| GRB         | GO:0016301   | F:kinase activity                                  | 3.82E-02       |
| GRM         | GO:0016301   | F:kinase activity                                  | 4.99E-12       |
| AGR         | GO:0008289   | F:lipid binding                                    | 9.83E-03       |
| AGR         | GO:0003674   | F:molecular_function                               | 9.58E-03       |
| ARB         | GO:0003674   | F:molecular_function                               | 4.59E-02       |
| ARB         | GO:0000166   | F:nucleotide binding                               | 6.68E-07       |
| GRB         | GO:0000166   | F:nucleotide binding                               | 2.48E-05       |
| GRC         | GO:0000166   | F:nucleotide binding                               | 1.57E-02       |
| GRM         | GO:0000166   | F:nucleotide binding                               | 1.07E-10       |
| ARC         | GO:0004872   | F:receptor activity                                | 4.37E-02       |
| ARC         | GO:0038023   | F:signaling receptor activity                      | 1.55E-02       |
| GRM         | GO:0007154   | P:cell communication                               | 6.06E-04       |
| ARC         | GO:0007267   | P:cell-cell signaling                              | 2.21E-07       |
| GRM         | GO:0007267   | P:cell-cell signaling                              | 1.03E-03       |
| GRM         | GO:0006464   | P:cellular protein modification process            | 1.45E-05       |
| RAM         | GO:0009790   | P:embryo development                               | 3.43E-02       |
| RAM         | GO:0009908   | P:flower development                               | 6.48E-04       |
| GAM         | GO:0006139   | P:nucleobase-containing compound metabolic process | 4.81E-02       |
| GRM         | GO:0009856   | P:pollination                                      | 5.40E-05       |

**Table S8.** Gene density averages per 10 kb and relative enrichment as presented in Table 1.

| <b>Trio</b> | <b>Avg. gene density</b> | <b>Relative. Enrichment</b> |
|-------------|--------------------------|-----------------------------|
| Genome-wide | 0.5762719                | -                           |
| ARC         | 0.4417671                | 0.77                        |
| GRC         | 0.4383202                | 0.76                        |
| GRB         | 0.433835                 | 0.75                        |
| ARB         | 0.4343598                | 0.75                        |
| GAM         | 0.5551546                | 0.96                        |
| RAM         | 0.5276498                | 0.92                        |
| GRM         | 0.4581006                | 0.79                        |
| MBC         | 0.4706927                | 0.82                        |
| AGR         | 0.5678322                | 0.99                        |

**Table S9.** Recombination rates per trio and values relative to the genome-wide estimated rate of recombination as presented in Table 1.

| <b>Trio</b> | <b>Avg. cM/Kb</b> | <b>Relative to genome-wide</b> |
|-------------|-------------------|--------------------------------|
| Genome-wide | 0.0092            | -                              |
| AGR         | 0.0148            | 1.61                           |
| ARB         | 0.0166            | 1.80                           |
| ARC         | 0.0113            | 1.23                           |
| GAM         | 0.0208            | 2.27                           |
| GRB         | 0.0132            | 1.43                           |
| GRC         | 0.0134            | 1.45                           |
| GRM         | 0.0111            | 1.21                           |
| MBC         | 0.0139            | 1.52                           |
| RAM         | 0.0101            | 1.10                           |

**Table S10.** Quantitative measurements of Pierce's Disease evaluations.

| <b>Accession</b> | <b>Sample ID</b> | <b>Species</b> | <b>Category</b> | <b>Least Sq Mean</b> | <b>Std Error</b> | <b>Mean</b> | <b>Study<sup>1</sup></b> |
|------------------|------------------|----------------|-----------------|----------------------|------------------|-------------|--------------------------|
| NM11-036         | vari04           | vari           | R               | 7.708                | 0.953            | 7.626       | Riaz et al 2020          |
| NM11-044f        | vari20           | vari           | R               | 7.890                | 0.953            | 7.808       | Riaz et al 2020          |
| NM11-031         | vari11           | vari           | R               | 7.942                | 0.948            | 7.376       | This study               |
| NM11-048         | vari12           | vari           | R               | 8.604                | 1.056            | 8.0375      | This study               |
| NM11-026         | vari09           | vari           | R               | 8.774                | 0.966            | 9.424       | This study               |
| NM11-038         | vari15           | vari           | R               | 8.845                | 1.067            | 9.5825      | This study               |
| NM11-044a        | vari19           | vari           | R               | 9.236                | 0.966            | 9.886       | This study               |
| NM11-043         | vari18           | vari           | R               | 9.466                | 0.966            | 10.116      | This study               |
| NM11-049         | vari01           | vari           | R               | 9.554                | 0.953            | 9.472       | Riaz et al 2020          |
| NM11-037         | vari05           | vari           | R               | 10.211               | 0.669            | 9.354       | This study               |
| TXNM088          | vber09           | vari           | R               | 10.724               | 0.953            | 10.642      | Riaz et al 2020          |
| NM11-033         | vari13           | vari           | R               | 10.742               | 0.966            | 11.392      | This study               |
| NM11-027         | vari10           | vari           | R               | 10.760               | 0.966            | 11.41       | This study               |
| NM11-046         | vari07           | vari           | R               | 10.871               | 0.939            | 10.014      | This study               |
| NM11-035         | vari03           | vari           | R               | 10.931               | 1.058            | 9.8675      | This study               |
| NM11-045         | vari02           | vari           | R               | 11.182               | 0.953            | 11.1        | Riaz et al 2020          |
| NM11-042         | vari17           | vari           | R               | 11.350               | 0.966            | 12          | This study               |
| NM11-040         | vari16           | vari           | R               | 11.458               | 0.966            | 12.108      | This study               |
| NM11-047         | vari21           | vari           | R               | 11.535               | 1.072            | 12.185      | This study               |
| NM11-039         | vari06           | vari           | R               | 12.228               | 0.953            | 12.146      | Riaz et al 2020          |
| ANU58            | vrip15           | vari           | R               | 12.485               | 0.939            | 11.628      | This study               |
| NM11-034         | vari14           | vari           | R               | 12.762               | 0.948            | 12.196      | This study               |
| T18              | vber29           | vber           | R               | 11.808               | 0.953            | 11.726      | This study               |
| TX16-034         | vber26           | vber           | S               | 12.472               | 0.965            | 14.172      | Riaz et al 2020          |
| C 5-93           | vber19           | vber           | R               | 13.102               | 0.948            | 12.536      | This study               |
| TX15-003         | vber10           | vber           | S               | 13.206               | 0.965            | 14.906      | Riaz et al 2020          |
| TX16-035         | vber27           | vber           | S               | 13.962               | 0.965            | 15.662      | Riaz et al 2020          |
| C 8-93           | vber20           | vber           | S               | 14.022               | 0.949            | 12.958      | This study               |
| T21              | vber02           | vber           | R               | 14.156               | 1.215            | 13.59       | This study               |
| TX15-059         | vber11           | vber           | S               | 14.270               | 0.949            | 13.206      | This study               |
| T 03-05 S03      | vber07           | vber           | S               | 14.782               | 0.950            | 14.754      | This study               |
| TX16-064         | vcan26           | vber           | S               | 14.997               | 1.217            | 13.9333     | This study               |
| TX16-018         | vber18           | vber           | S               | 15.285               | 1.071            | 16.985      | Riaz et al 2020          |
| TX16-032         | vber14           | vber           | S               | 15.362               | 1.071            | 17.0625     | Riaz et al 2020          |
| T38              | vber04           | vber           | S               | 15.852               | 1.061            | 15.77       | This study               |
| TX43-01          | vber01           | vber           | S               | 16.148               | 1.219            | 16.0667     | This study               |

|                   |        |      |   |        |       |         |                 |
|-------------------|--------|------|---|--------|-------|---------|-----------------|
| TX15-063          | vber23 | vber | S | 16.172 | 0.965 | 17.872  | Riaz et al 2020 |
| TX16-016          | vber17 | vber | S | 16.346 | 0.965 | 18.046  | Riaz et al 2020 |
| TX16-022          | vber21 | vber | S | 16.657 | 1.071 | 18.3575 | Riaz et al 2020 |
| TX16-065          | vber28 | vber | S | 16.886 | 0.965 | 18.586  | Riaz et al 2020 |
| TX16-026          | vber12 | vber | S | 17.016 | 0.965 | 18.716  | Riaz et al 2020 |
| TX16-030          | vber13 | vber | S | 17.054 | 0.965 | 18.754  | Riaz et al 2020 |
| TX9722            | vber05 | vber | S | 17.904 | 0.953 | 17.822  | Riaz et al 2020 |
| T2                | vcan10 | vcan | R | 7.052  | 1.068 | 6.14    | This study      |
| T48               | vcan03 | vcan | R | 9.499  | 0.554 | 8.6807  | Riaz et al 2020 |
| T45               | vcan02 | vcan | R | 10.140 | 0.961 | 9.228   | Riaz et al 2020 |
| T46               | vcan14 | vcan | R | 10.204 | 1.061 | 8.9825  | Riaz et al 2020 |
| candicans<br>9039 | vcan31 | vcan | R | 10.441 | 1.483 | 9.875   | This study      |
| TX9715            | vcan15 | vcan | R | 10.748 | 0.953 | 10.666  | Riaz et al 2020 |
| TX12-003          | vcan09 | vcan | R | 10.999 | 0.870 | 9.935   | This study      |
| T62               | vcan16 | vcan | R | 11.060 | 0.680 | 9.993   | Riaz et al 2020 |
| T73               | vcan11 | vcan | R | 11.068 | 0.949 | 10.004  | This study      |
| T56               | vcan08 | vcan | R | 11.115 | 0.879 | 11.5017 | Riaz et al 2020 |
| TX16-001          | vcan24 | vcan | R | 11.152 | 0.949 | 10.088  | This study      |
| TX16-006          | vcan25 | vcan | R | 11.216 | 0.949 | 10.152  | This study      |
| TX9703            | vcan12 | vcan | R | 11.478 | 0.752 | 10.8188 | Riaz et al 2020 |
| T64               | vcan17 | vcan | R | 11.491 | 1.063 | 11.17   | Riaz et al 2020 |
| T 03-08           | vcan20 | vcan | R | 11.632 | 0.949 | 10.568  | This study      |
| T36               | vcan13 | vcan | R | 11.718 | 0.645 | 10.8009 | Riaz et al 2020 |
| T 03-05           | vcan19 | vcan | R | 12.318 | 0.949 | 11.254  | This study      |
| TX14-081          | vcan23 | vcan | R | 12.386 | 0.949 | 11.322  | This study      |
| TX32-01           | vcan04 | vcan | R | 12.617 | 0.954 | 11.396  | Riaz et al 2020 |
| T 03-13           | vcan21 | vcan | R | 12.728 | 0.949 | 11.664  | This study      |
| candicans<br>9003 | vcan29 | vcan | R | 12.808 | 0.948 | 12.242  | This study      |
| candicans<br>9001 | vcan28 | vcan | R | 13.218 | 0.948 | 12.652  | This study      |
| candicans<br>9005 | vcan30 | vcan | R | 13.310 | 0.948 | 12.744  | This study      |
| TX16-024          | vcan27 | vcan | R | 13.319 | 0.870 | 12.255  | This study      |
| SC36              | vgir27 | vgir | R | 9.368  | 0.539 | 8.8462  | Riaz et al 2020 |
| NV11-118          | vgir12 | vgir | R | 9.754  | 0.953 | 9.672   | This study      |
| NV11-116          | vgir11 | vgir | R | 10.340 | 0.953 | 10.258  | This study      |
| SC53              | vgir17 | vgir | R | 10.728 | 0.949 | 9.664   | This study      |
| SC30              | vgir22 | vgir | R | 10.857 | 0.879 | 11.2433 | Riaz et al 2020 |
| SC51              | vgir16 | vgir | R | 11.352 | 0.949 | 10.288  | This study      |
| SC39              | vgir26 | vgir | R | 11.460 | 0.879 | 11.8467 | Riaz et al 2020 |

|                               |        |      |   |        |       |         |                 |
|-------------------------------|--------|------|---|--------|-------|---------|-----------------|
| SC26                          | vgir23 | vgir | R | 12.232 | 0.879 | 12.6183 | Riaz et al 2020 |
| NV11-115                      | vgir10 | vgir | R | 12.264 | 0.953 | 12.182  | This study      |
| ANU78                         | vgir02 | vgir | R | 13.300 | 0.879 | 13.6867 | Riaz et al 2020 |
| SC11                          | vgir25 | vgir | R | 14.202 | 0.879 | 14.5883 | Riaz et al 2020 |
| SC33                          | vgir21 | vgir | S | 14.544 | 1.217 | 13.48   | This study      |
| SC40                          | vgir20 | vgir | R | 14.673 | 0.939 | 13.816  | This study      |
| SC9                           | vgir06 | vgir | S | 16.426 | 0.949 | 15.362  | This study      |
| NV12-040                      | vgir01 | vgir | S | 16.536 | 0.953 | 16.454  | This study      |
| NV12-041                      | vgir14 | vgir | S | 16.669 | 1.061 | 16.5875 | This study      |
| NV12-050                      | vgir15 | vgir | S | 16.814 | 1.058 | 15.75   | This study      |
| T 03-02 S01                   | vmon04 | vmon | R | 11.248 | 0.958 | 11.634  | This study      |
| T40                           | vmon02 | vmon | R | 12.520 | 0.958 | 12.906  | Riaz et al 2020 |
| C20-93-A<br>monticola<br>9040 | vmon05 | vmon | R | 13.572 | 0.948 | 13.006  | This study      |
|                               | vmon07 | vmon | R | 13.948 | 0.948 | 13.382  | This study      |
| TX67-03                       | vmon01 | vmon | S | 14.244 | 0.972 | 13.068  | Riaz et al 2020 |
| TXNM0823                      | vrip16 | vrip | R | 12.131 | 0.939 | 11.274  | This study      |
| NM12-111                      | vrip06 | vrip | R | 14.243 | 0.939 | 13.386  | This study      |
| NM12-104                      | vrip18 | vrip | S | 14.588 | 0.953 | 14.506  | This study      |
| NM12-119                      | vrip21 | vrip | S | 15.080 | 0.953 | 14.998  | This study      |
| KS14-035                      | vrip11 | vrip | S | 15.404 | 0.948 | 14.838  | This study      |
| OK14-064                      | vrip13 | vrip | S | 15.502 | 0.949 | 14.438  | This study      |
| CO12-103                      | vrip02 | vrip | S | 15.681 | 0.939 | 14.824  | This study      |
| KS14-036                      | vrip12 | vrip | S | 15.754 | 0.948 | 15.188  | This study      |
| NM12-108                      | vrip19 | vrip | S | 15.834 | 0.949 | 14.77   | This study      |
| NM12-116                      | vrip08 | vrip | S | 16.719 | 0.859 | 15.8617 | This study      |
| OK14-026                      | vrip01 | vrip | S | 16.904 | 1.058 | 15.84   | This study      |
| NM12-117                      | vrip09 | vrip | S | 17.080 | 0.953 | 16.998  | This study      |
| OK14-027                      | vrip10 | vrip | S | 17.109 | 1.225 | 17.8467 | This study      |
| TXNM0824                      | vrip17 | vrip | S | 17.139 | 0.939 | 16.282  | This study      |
| V28-96                        | vrip05 | vrip | S | 17.282 | 1.492 | 16.37   | This study      |
| V23-98                        | vrip04 | vrip | S | 17.477 | 1.492 | 16.565  | This study      |
| NM12-114                      | vrip07 | vrip | S | 17.899 | 0.939 | 17.042  | This study      |
| CO12-102                      | vrip14 | vrip | S | 18.290 | 0.953 | 18.208  | This study      |
| KS14-043                      | vrip23 | vrip | S | 18.979 | 0.939 | 18.122  | This study      |

1. Riaz et 2020 refers to ref. 121 in the main text.



**Table S11.** Enrichments of SNPs significantly associated with PD in pIRs. Significance was calculated with randomization tests of 10,000 permutations.

| <b>Trio</b> | <b>Relative enrichment</b> | <b>Randomization p-value</b> |
|-------------|----------------------------|------------------------------|
| GAM         | <b>2.19</b>                | <b>9.00E-04</b>              |
| ARC         | <b>2.47</b>                | <b>1.19E-02</b>              |
| GRC         | <b>2.47</b>                | <b>3.37E-02</b>              |
| RAM         | <b>1.12</b>                | 5.17E-01                     |
| GRB         | <b>1.03</b>                | 8.13E-01                     |
| ARB         | <b>1.09</b>                | 8.47E-01                     |
| GRM         | 0.81                       | 9.14E-01                     |
| AGR         | 0.80                       | 9.39E-01                     |
| MBC         | 0.59                       | 9.80E-01                     |

**Table S12.** Enrichments of SNPs associated to the the top three bioclimatic variables per trio in pIRs. Significance was calculated with randomization tests of 10,000 permutations.

| <b>Trio</b> | <b>Sp. Assoc</b>      | <b>BIO</b> | <b>Relative enrichment</b> | <b>Randomization (p-value)</b> |
|-------------|-----------------------|------------|----------------------------|--------------------------------|
| AGR         | <i>V. girdiana</i>    | 2          | <b>1.80</b>                | <b>0.00E+00</b>                |
| AGR         | <i>V. girdiana</i>    | 6          | <b>1.15</b>                | 1.00E+00                       |
| AGR         | <i>V. girdiana</i>    | 17         | <b>1.30</b>                | 8.15E-01                       |
| ARB         | <i>V. riparia</i>     | 1          | <b>1.34</b>                | <b>0.00E+00</b>                |
| ARB         | <i>V. riparia</i>     | 2          | <b>1.31</b>                | <b>0.00E+00</b>                |
| ARB         | <i>V. riparia</i>     | 6          | <b>1.18</b>                | 1.48E-01                       |
| ARC         | <i>V. riparia</i>     | 1          | <b>1.07</b>                | <b>2.65E-02</b>                |
| ARC         | <i>V. riparia</i>     | 2          | <b>1.28</b>                | <b>0.00E+00</b>                |
| ARC         | <i>V. riparia</i>     | 6          | <b>1.06</b>                | <b>8.70E-03</b>                |
| GAM         | <i>V. arizonica</i>   | 6          | <b>1.37</b>                | <b>0.00E+00</b>                |
| GAM         | <i>V. arizonica</i>   | 11         | <b>1.06</b>                | 1.00E+00                       |
| GAM         | <i>V. arizonica</i>   | 14         | <b>1.38</b>                | <b>0.00E+00</b>                |
| GRB         | <i>V. riparia</i>     | 1          | <b>1.07</b>                | 6.06E-01                       |
| GRB         | <i>V. riparia</i>     | 2          | <b>1.24</b>                | <b>0.00E+00</b>                |
| GRB         | <i>V. riparia</i>     | 6          | <b>1.08</b>                | 5.47E-01                       |
| GRC         | <i>V. riparia</i>     | 1          | <b>1.34</b>                | <b>2.00E-04</b>                |
| GRC         | <i>V. riparia</i>     | 2          | <b>1.46</b>                | <b>0.00E+00</b>                |
| GRC         | <i>V. riparia</i>     | 6          | <b>1.21</b>                | 6.61E-02                       |
| GRM         | <i>V. riparia</i>     | 1          | <b>1.12</b>                | 2.96E-01                       |
| GRM         | <i>V. riparia</i>     | 2          | <b>1.15</b>                | 7.95E-02                       |
| GRM         | <i>V. riparia</i>     | 6          | <b>1.12</b>                | 1.90E-01                       |
| MBC         | <i>V. berlandieri</i> | 2          | <b>1.77</b>                | <b>0.00E+00</b>                |
| MBC         | <i>V. berlandieri</i> | 9          | <b>2.13</b>                | <b>0.00E+00</b>                |
| MBC         | <i>V. berlandieri</i> | 11         | <b>2.15</b>                | <b>0.00E+00</b>                |
| RAM         | <i>V. arizonica</i>   | 6          | <b>1.93</b>                | <b>0.00E+00</b>                |
| RAM         | <i>V. arizonica</i>   | 11         | <b>1.07</b>                | 1.00E+00                       |
| RAM         | <i>V. arizonica</i>   | 14         | <b>1.52</b>                | <b>0.00E+00</b>                |
